# Supplementary material
Source: PubMed Central journal article supplement (PMC5727822)
Supplement: ba006429-suppl1.pdf [file ba006429-suppl1.pdf]

**Table S1. Patients, donors and transplant characteristics of the overall cohort.**

|                                                                                                                                                                                             | <b>Entire population<br/>(n=509)</b>                 | <b>Subgroup with HLA<br/>allele level (n=418)</b>      |
|---------------------------------------------------------------------------------------------------------------------------------------------------------------------------------------------|------------------------------------------------------|--------------------------------------------------------|
| Patient age y, median (range)                                                                                                                                                               | 45 (18 – 78)                                         | 45 (18 – 78)                                           |
| Patient sex, male (%)                                                                                                                                                                       | 292 (57%)                                            | 241 (58%)                                              |
| Time from diagnosis to transplant, months, median (range)                                                                                                                                   | 10 (2 – 192)                                         | 10 (2 – 192)                                           |
| AML/ALL, n (%)                                                                                                                                                                              | 373 (73%)/136 (27%)                                  | 312 (75%)/106 (25%)                                    |
| Disease status at transplant, n (%)                                                                                                                                                         |                                                      |                                                        |
| CR1                                                                                                                                                                                         | 182 (36%)                                            | 145 (35%)                                              |
| CR≥2                                                                                                                                                                                        | 137 (27%)                                            | 113 (27%)                                              |
| Advanced (Primary induction failure, Relapse)                                                                                                                                               | 190 (37%)                                            | 160 (38%)                                              |
| Cytogenetic risk stratification, n (%)*                                                                                                                                                     |                                                      |                                                        |
| AML:                                                                                                                                                                                        |                                                      |                                                        |
| Favorable: t(8;21)(q22;q22); RUNX1-RUNX1T1<br>inv(16)(p13.1;q22) or t(16;16)(p13.1;q22); CFBF-MYH11<br>Mutated NPM1 without FLT3-ITD (normal karyotype)<br>Mutated CEBPA (normal karyotype) | 34 (12%)                                             | 27 (11%)                                               |
| Intermediate I: Mutated NPM1 and FLT3-ITD (normal karyotype)<br>Wild-type NPM1 and FLT3-ITD (normal karyotype)<br>Wild-type NPM1 without FLT3-ITD (normal karyotype)                        | 138 (47%)                                            | 117 (46%)                                              |
| Intermediate II: t(9;11)(p22;q23); MLLT3-MLL<br>Cytogenetic abnormalities not classified as favorable or<br>Adverse                                                                         | 52 (18%)                                             | 46 (18%)                                               |
| Adverse: inv(3)(q21q26.2) or t(3;3)(q21;q26.2); RPN1-EV11<br>t(6;9)(p23;q34); DEK-NUP214<br>t(v;11)(v;q23); MLL rearranged<br>5 or del(5q); -7; abn(17p); complex karyotype                 | 68 (23%)                                             | 63 (25%)                                               |
| ALL:                                                                                                                                                                                        |                                                      |                                                        |
| Standard                                                                                                                                                                                    | 38 (42%)                                             | 31 (42%)                                               |
| Poor: complex (>5 abn), t(9;22), t(4;11), t(8;14), hypodiploid                                                                                                                              | 52 (58%)                                             | 42 (58%)                                               |
| Donor age y, median (range)                                                                                                                                                                 | 38 (12 – 74)                                         | 39 (12 – 74)                                           |
| Donor sex, male (%)                                                                                                                                                                         | 271 (53%)                                            | 225 (54%)                                              |
| Female donor/male recipient, n (%)                                                                                                                                                          | 134 (26%)                                            | 111 (27%)                                              |
| CMV serostatus, donor/patient, n (%)                                                                                                                                                        |                                                      |                                                        |
| Negative/negative                                                                                                                                                                           | 57 (11%)                                             | 49 (12%)                                               |
| Other combinations                                                                                                                                                                          | 452 (89%)                                            | 369 (88%)                                              |
| Intensity of conditioning regimen, n (%)                                                                                                                                                    |                                                      |                                                        |
| RIC                                                                                                                                                                                         | 265 (52%)                                            | 219 (52%)                                              |
| MAC                                                                                                                                                                                         | 244 (48%)                                            | 199 (48%)                                              |
| Donor stem cell source, n (%)                                                                                                                                                               |                                                      |                                                        |
| PB                                                                                                                                                                                          | 309 (61%)                                            | 250 (60%)                                              |
| BM                                                                                                                                                                                          | 200 (39%)                                            | 168 (40%)                                              |
| GvHD prophylaxis regimen details:                                                                                                                                                           |                                                      |                                                        |
| PTCy                                                                                                                                                                                        | 313 (61%)                                            | 258 (62%)                                              |
| ATG                                                                                                                                                                                         | 196 (39%)                                            | 160 (38%)                                              |
| <b>HLA A locus:</b>                                                                                                                                                                         | <b>Ag mismatch: 430 (84%)<br/>Ag match: 79 (16%)</b> | <b>All mismatch: 379 (90%)<br/>All match: 39 (10%)</b> |
| <b>HLA B locus:</b>                                                                                                                                                                         | <b>Ag mismatch: 454 (89%)<br/>Ag match: 55 (11%)</b> | <b>All mismatch: 383 (91%)<br/>All match: 35 (9%)</b>  |
| <b>HLA C locus:</b>                                                                                                                                                                         | <b>Ag mismatch: 417 (82%)<br/>Ag match: 92 (18%)</b> | <b>All mismatch: 374 (89%)<br/>All match: 44 (11%)</b> |
| <b>HLA DRB1 locus:</b>                                                                                                                                                                      | <b>Ag mismatch: 418 (82%)<br/>Ag match: 91 (18%)</b> | <b>All mismatch: 383 (91%)<br/>All match: 35 (9%)</b>  |

**Table S2. Univariate analysis of outcome according to HLA matching status.**

| <b>PTCy regimens</b>        |                                            |                           |                  |                          |                |                    |               |                |
|-----------------------------|--------------------------------------------|---------------------------|------------------|--------------------------|----------------|--------------------|---------------|----------------|
|                             | <b>60-d PMN&gt;<br/>500/mm<sup>3</sup></b> | <b>100-d<br/>aGvHD ≥2</b> | <b>2-y cGvHD</b> | <b>2-y<br/>Ext cGvHD</b> | <b>2-y TRM</b> | <b>2-y Relapse</b> | <b>2-y OS</b> | <b>2-y LFS</b> |
| HLA-A antigenic match       | 94 [82 – 98]                               | 40 [27 – 53]              | 27 [15 – 40]     | 12 [5 – 23]              | 31 [19 – 44]   | 32 [19 – 45]       | 40 [26 – 53]  | 36 [23 – 50]   |
| HLA-A antigenic mismatch    | 95 [91 – 97]                               | 29 [24 – 35]              | 28 [22 – 34]     | 16 [7 – 15]              | 27 [21 – 33]   | 33 [27 – 39]       | 45 [38 – 51]  | 40 [33 – 46]   |
| <b>p</b>                    | 0.50                                       | 0.12                      | 0.94             | 0.76                     | 0.37           | 0.89               | 0.38          | 0.50           |
| HLA-A allelic match         | 92 [70 – 98]                               | 35 [18 – 52]              | 27 [12 – 46]     | 16 [5 – 32]              | 17 [6 – 33]    | 28 [13 – 46]       | 56 [36 – 72]  | 53 [33 – 69]   |
| HLA-A allelic mismatch      | 95 [90 – 97]                               | 28 [22 – 34]              | 27 [21 – 34]     | 12 [8 – 17]              | 28 [22 – 34]   | 34 [27 – 40]       | 42 [35 – 49]  | 37 [30 – 44]   |
| <b>p</b>                    | 0.49                                       | 0.45                      | 0.96             | 0.63                     | 0.35           | 0.36               | 0.42          | 0.48           |
| HLA-B antigenic match       | 94 [76 – 98]                               | 42 [26 – 58]              | 22 [10 – 38]     | 10 [2 – 23]              | 16 [5 – 30]    | 34 [18 – 50]       | 58 [38 – 73]  | 49 [30 – 65]   |
| HLA-B antigenic mismatch    | 95 [91 – 97]                               | 30 [24 – 53]              | 28 [23 – 34]     | 11 [8 – 16]              | 29 [23 – 35]   | 32 [26 – 38]       | 42 [36 – 48]  | 38 [32 – 44]   |
| <b>p</b>                    | 0.70                                       | 0.08                      | 0.53             | 0.79                     | 0.08           | 0.95               | 0.11          | 0.16           |
| HLA-B allelic match         | 94 [71 – 99]                               | 38 [16 – 60]              | 17 [4 – 39]      | 12 [2 – 32]              | 17 [4 – 39]    | 22 [7 – 44]        | 57 [30 – 77]  | 58 [31 – 78]   |
| HLA-B allelic mismatch      | 94 [90 – 97]                               | 28 [22 – 34]              | 28 [22 – 34]     | 12 [8 – 17]              | 27 [21 – 33]   | 34 [28 – 40]       | 43 [36 – 50]  | 38 [31 – 45]   |
| <b>p</b>                    | 0.61                                       | 0.27                      | 0.43             | 0.99                     | 0.35           | 0.36               | 0.28          | 0.18           |
| HLA-C antigenic match       | 92 [79 – 97]                               | 33 [20 – 45]              | 21 [11 – 34]     | 10 [4 – 21]              | 22 [11 – 35]   | 28 [16 – 41]       | 54 [39 – 67]  | 49 [34 – 62]   |
| HLA-C antigenic mismatch    | 95 [91 – 97]                               | 31 [25 – 37]              | 29 [23 – 35]     | 11 [7 – 16]              | 29 [23 – 35]   | 33 [27 – 39]       | 42 [35 – 48]  | 37 [31 – 44]   |
| <b>p</b>                    | 0.59                                       | 0.71                      | 0.31             | 0.92                     | 0.35           | 0.46               | 0.14          | 0.18           |
| HLA-C allelic match         | 95 [69 – 99]                               | 19 [6 – 38]               | 20 [6 – 40]      | 20 [6 – 40]              | 14 [3 – 33]    | 30 [11 – 52]       | 60 [35 – 78]  | 53 [28 – 73]   |
| HLA-C allelic mismatch      | 95 [90 – 97]                               | 30 [24 – 36]              | 28 [22 – 34]     | 11 [7 – 16]              | 28 [22 – 34]   | 33 [27 – 40]       | 42 [35 – 49]  | 38 [31 – 45]   |
| <b>p</b>                    | 0.60                                       | 0.31                      | 0.50             | 0.21                     | 0.19           | 0.64               | 0.17          | 0.17           |
| HLA-DRB1 antigenic match    | 89 [75 – 95]                               | 17 [9 – 29]               | 37 [24 – 51]     | 19 [9 – 31]              | 36 [23 – 49]   | 20 [10 – 33]       | 48 [34 – 61]  | 44 [30 – 57]   |
| HLA-DRB1 antigenic mismatch | 95 [92 – 98]                               | 34 [28 – 40]              | 25 [20 – 31]     | 9 [6 – 14]               | 26 [20 – 31]   | 35 [29 – 41]       | 43 [36 – 49]  | 38 [32 – 45]   |
| <b>p</b>                    | 0.19                                       | 0.02                      | 0.13             | 0.07                     | 0.10           | 0.09               | 0.86          | 0.67           |
| HLA-DRB1 allelic match      | 95 [66 – 99]                               | 19 [6 – 38]               | 27 [9 – 49]      | 21 [6 – 43]              | 39 [18 – 60]   | 25 [9 – 47]        | 42 [20 – 62]  | 36 [16 – 56]   |
| HLA-DRB1 allelic mismatch   | 95 [90 – 97]                               | 30 [24 – 36]              | 27 [21 – 34]     | 11 [7 – 16]              | 25 [20 – 31]   | 34 [27 – 40]       | 44 [37 – 51]  | 40 [33 – 47]   |
| <b>p</b>                    | 0.69                                       | 0.33                      | 0.74             | 0.28                     | 0.08           | 0.31               | 0.68          | 0.77           |
| <b>ATG regimens</b>         |                                            |                           |                  |                          |                |                    |               |                |
|                             | <b>60-d PMN&gt;<br/>500/mm<sup>3</sup></b> | <b>100-d<br/>aGvHD ≥2</b> | <b>2-y cGvHD</b> | <b>2-y<br/>Ext cGvHD</b> | <b>2-y TRM</b> | <b>2-y Relapse</b> | <b>2-y OS</b> | <b>2-y LFS</b> |
| HLA-A antigenic match       | 92 [71 – 98]                               | 27 [12 – 45]              | 29 [12 – 48]     | 12 [3 – 28]              | 24 [9 – 43]    | 48 [27 – 67]       | 44 [25 – 63]  | 28 [12 – 46]   |
| HLA-A antigenic mismatch    | 98 [94 – 99]                               | 35 [28 – 42]              | 33 [26 – 41]     | 14 [9 – 19]              | 30 [23 – 37]   | 37 [29 – 44]       | 40 [32 – 47]  | 34 [27 – 41]   |
| <b>p</b>                    | 0.12                                       | 0.36                      | 0.47             | 0.61                     | 0.46           | 0.46               | 0.62          | 0.79           |
| HLA-A allelic match         | 90 [70 – 98]                               | 22 [3 – 53]               | 25 [7 – 47]      | 12 [3 – 27]              | 29 [12 – 52]   | 33 [13 – 62]       | 27 [4 – 58]   | 25 [2 – 56]    |
| HLA-A allelic mismatch      | 98 [93 – 99]                               | 35 [28 – 43]              | 34 [27 – 42]     | 15 [10 – 21]             | 32 [25 – 40]   | 34 [26 – 42]       | 39 [30 – 47]  | 34 [26 – 42]   |
| <b>p</b>                    | 0.18                                       | 0.35                      | 0.59             | 0.81                     | 0.54           | 0.55               | 0.81          | 0.42           |
| HLA-B antigenic match       | 94 [70 – 99]                               | 26 [9 – 47]               | 36 [13 – 59]     | 5 [1 – 22]               | 22 [6 – 43]    | 39 [16 – 60]       | 45 [22 – 65]  | 40 [18 – 61]   |
| HLA-B antigenic mismatch    | 97 [93 – 99]                               | 35 [28 – 42]              | 32 [25 – 40]     | 14 [9 – 20]              | 30 [23 – 37]   | 38 [31 – 46]       | 40 [32 – 47]  | 32 [25 – 39]   |
| <b>p</b>                    | 0.84                                       | 0.52                      | 0.86             | 0.27                     | 0.55           | 0.75               | 0.55          | 0.15           |
| HLA-B allelic match         | 93 [69 – 99]                               | 13 [2 – 35]               | 22 [5 – 48]      | 7 [2 – 27]               | 28 [8 – 53]    | 36 [12 – 61]       | 43 [18 – 67]  | 36 [13 – 60]   |
| HLA-B allelic mismatch      | 98 [93 – 99]                               | 37 [29 – 45]              | 35 [27 – 43]     | 15 [10 – 22]             | 34 [26 – 42]   | 35 [27 – 43]       | 37 [29 – 46]  | 31 [24 – 39]   |
| <b>p</b>                    | 0.73                                       | 0.10                      | 0.43             | 0.41                     | 0.46           | 0.45               | 0.49          | 0.81           |
| HLA-C antigenic match       | 97 [81 – 99]                               | 31 [17 – 46]              | 35 [19 – 52]     | 11 [3 – 23]              | 24 [12 – 38]   | 31 [17 – 47]       | 51 [34 – 66]  | 45 [29 – 60]   |
| HLA-C antigenic mismatch    | 97 [93 – 99]                               | 35 [27 – 42]              | 32 [25 – 40]     | 14 [9 – 20]              | 30 [23 – 38]   | 40 [32 – 48]       | 37 [30 – 45]  | 30 [33 – 37]   |
| <b>p</b>                    | 0.71                                       | 0.63                      | 0.62             | 0.75                     | 0.60           | 0.43               | 0.21          | 0.15           |
| HLA-C allelic match         | 95 [72 – 99]                               | 29 [11 – 49]              | 26 [9 – 48]      | 15 [3 – 34]              | 30 [12 – 52]   | 30 [12 – 51]       | 44 [21 – 64]  | 40 [19 – 60]   |
| HLA-C allelic mismatch      | 98 [93 – 99]                               | 36 [27 – 44]              | 35 [27 – 43]     | 14 [9 – 21]              | 34 [26 – 42]   | 35 [27 – 44]       | 37 [28 – 45]  | 31 [23 – 39]   |
| <b>p</b>                    | 0.78                                       | 0.51                      | 0.70             | 0.59                     | 0.83           | 0.74               | 0.48          | 0.48           |
| HLA-DRB1 antigenic match    | 92 [76 – 97]                               | 30 [16 – 46]              | 30 [15 – 46]     | 11 [3 – 24]              | 17 [7 – 31]    | 46 [29 – 62]       | 47 [29 – 62]  | 37 [22 – 53]   |
| HLA-DRB1 antigenic mismatch | 98 [95 – 99]                               | 35 [27 – 42]              | 34 [26 – 41]     | 14 [9 – 20]              | 32 [25 – 40]   | 36 [29 – 44]       | 39 [31 – 47]  | 32 [25 – 40]   |
| <b>p</b>                    | 0.62                                       | 0.54                      | 0.59             | 0.77                     | 0.04           | 0.11               | 0.31          | 0.64           |
| HLA-DRB1 allelic match      | 92 [71 – 99]                               | 58 [25 – 81]              | 33 [9 – 61]      | 8 [2 – 33]               | 38 [8 – 69]    | 35 [9 – 63]        | 29 [5 – 60]   | 27 [5 – 56]    |
| HLA-DRB1 allelic mismatch   | 98 [94 – 99]                               | 33 [25 – 40]              | 34 [26 – 42]     | 15 [10 – 21]             | 33 [25 – 41]   | 35 [27 – 43]       | 38 [30 – 46]  | 32 [25 – 40]   |
| <b>p</b>                    | 0.73                                       | 0.08                      | 0.82             | 0.52                     | 0.98           | 0.87               | 0.86          | 0.83           |

Numbers correspond to % [95% CI].

**Table S3. Univariate analysis for engraftment outcome according to the direction of HLA mismatches.**

| <b>PTCy regimens</b>                                                 |                                        |
|----------------------------------------------------------------------|----------------------------------------|
|                                                                      | <b>60-d PMN&gt; 500/mm<sup>3</sup></b> |
| HLA-A match or GvH-directed mismatch (antigenic) (n=76)              | 93 [83 – 97]                           |
| HLA-A bidirectional or HvG-directed mismatch (antigenic) (n=237)     | 95 [91 – 97]                           |
| <b>p</b>                                                             | 0.62                                   |
| HLA-A match or GvH -directed mismatch (allelic) (n=56)               | 92 [78 – 97]                           |
| HLA-A bidirectional or HvG -directed mismatch (allelic) (n=202)      | 95 [91 – 98]                           |
| <b>p</b>                                                             | 0.40                                   |
| HLA-B match or GvH -directed mismatch (antigenic) (n=51)             | 93 [80 – 98]                           |
| HLA-B bidirectional or HvG -directed mismatch (antigenic) (n=262)    | 95 [91 – 97]                           |
| <b>p</b>                                                             | 0.15                                   |
| HLA-B match or GvH -directed mismatch (allelic) (n=36)               | 96 [76 – 99]                           |
| HLA-B bidirectional or HvG -directed mismatch (allelic) (n=222)      | 94 [90 – 97]                           |
| <b>p</b>                                                             | 0.23                                   |
| HLA-C match or GvH -directed mismatch (antigenic) (n=80)             | 94 [85 – 98]                           |
| HLA-C bidirectional or HvG -directed mismatch (antigenic) (n=233)    | 95 [90 – 97]                           |
| <b>p</b>                                                             | 0.98                                   |
| HLA-C match or GvH -directed mismatch (allelic) (n=55)               | 98 [85 – 100]                          |
| HLA-C bidirectional or HvG -directed mismatch (allelic) (n= 203)     | 94 [89 – 96]                           |
| <b>p</b>                                                             | 0.57                                   |
| HLA-DRB1 match or GvH -directed mismatch (antigenic) (n=82)          | 92 [81 – 96]                           |
| HLA-DRB1 bidirectional or HvG -directed mismatch (antigenic) (n=231) | 95 [91 – 97]                           |
| <b>p</b>                                                             | 0.86                                   |
| HLA-DRB1 match or GvH -directed mismatch (allelic) (n=53)            | 93 [79 – 98]                           |
| HLA-DRB1 bidirectional or HvG -directed mismatch (allelic) (n=205)   | 95 [91 – 97]                           |
| <b>p</b>                                                             | 0.98                                   |
| <b>ATG regimens</b>                                                  |                                        |
|                                                                      | <b>60-d PMN&gt; 500/mm<sup>3</sup></b> |
| HLA-A match or GvH -directed mismatch (antigenic) (n=44)             | 96 [83 – 99]                           |
| HLA-A bidirectional or HvG H-directed mismatch (antigenic) (n=152)   | 98 [93 – 99]                           |
| <b>p</b>                                                             | 0.13                                   |
| HLA-A match or GvH -directed mismatch (allelic) (n=24)               | 96 [74 – 99]                           |
| HLA-A bidirectional or HvG -directed mismatch (allelic) (n=136)      | 98 [94 – 99]                           |
| <b>p</b>                                                             | 0.18                                   |
| HLA-B match or GvH -directed mismatch (antigenic) (n=30)             | 97 [76 – 99]                           |
| HLA-B bidirectional or HvG -directed mismatch (antigenic) (n=166)    | 97 [92 – 99]                           |
| <b>p</b>                                                             | 0.69                                   |
| HLA-B match or GvH -directed mismatch (allelic) (n=22)               | 95 [71 – 99]                           |
| HLA-B bidirectional or HvG -directed mismatch (allelic) (n=138)      | 98 [93 – 99]                           |
| <b>p</b>                                                             | 0.44                                   |
| HLA-C match or GvH -directed mismatch (antigenic) (n=54)             | 98 [86 – 99]                           |
| HLA-C bidirectional or HvG -directed mismatch (antigenic) (n=142)    | 97 [92 – 99]                           |
| <b>p</b>                                                             | 0.98                                   |
| HLA-C match or GvH -directed mismatch (allelic) (n=39)               | 97 [81 – 99]                           |
| HLA-C bidirectional or HvG -directed mismatch (allelic) (n=121)      | 97 [92 – 99]                           |
| <b>p</b>                                                             | 0.99                                   |
| HLA-DRB1 match or GvH -directed mismatch (antigenic) (n=52)          | 94 [83 – 98]                           |
| HLA-DRB1 bidirectional or HvG -directed mismatch (antigenic) (n=144) | 98 [94 – 99]                           |
| <b>p</b>                                                             | 0.34                                   |
| HLA-DRB1 match or GvH -directed mismatch (allelic) (n=31)            | 97 [77 – 99]                           |
| HLA-DRB1 bidirectional or HvG -directed mismatch (allelic) (n=129)   | 98 [93 – 99]                           |
| <b>p</b>                                                             | 0.51                                   |

Numbers correspond to % [95% CI].

**Table S4. Univariate analysis for GvHD outcome according to the direction of HLA mismatches.**

| <b>PTCy regimens</b>                                                |                                        |                  |
|---------------------------------------------------------------------|----------------------------------------|------------------|
|                                                                     | <b>100-d aGvHD <math>\geq 2</math></b> | <b>2-y cGvHD</b> |
| HLA-A match or HvG-directed mismatch (antigenic) (n=76)             | 37 [26 – 48]                           | 27 [17 – 38]     |
| HLA-A bidirectional or GvH-directed mismatch (antigenic) (n=237)    | 29 [23 – 35]                           | 28 [21 – 34]     |
| <b>p</b>                                                            | 0.19                                   | 0.93             |
| HLA-A match or HvG-directed mismatch (allelic) (n=56)               | 36 [23 – 49]                           | 28 [16 – 41]     |
| HLA-A bidirectional or GvH-directed mismatch (allelic) (n=202)      | 27 [21 – 34]                           | 27 [20 – 34]     |
| <b>p</b>                                                            | 0.22                                   | 0.78             |
| HLA-B match or HvG-directed mismatch (antigenic) (n=51)             | 39 [26 – 53]                           | 25 [13 – 38]     |
| HLA-B bidirectional or GvH-directed mismatch (antigenic) (n=262)    | 29 [24 – 35]                           | 28 [22 – 34]     |
| <b>p</b>                                                            | 0.08                                   | 0.72             |
| HLA-B match or HvG-directed mismatch (allelic) (n=36)               | 34 [19 – 49]                           | 19 [8 – 35]      |
| HLA-B bidirectional or GvH-directed mismatch (allelic) (n=222)      | 28 [22 – 35]                           | 28 [22 – 35]     |
| <b>p</b>                                                            | 0.34                                   | 0.37             |
| HLA-C match or HvG-directed mismatch (antigenic) (n=80)             | 27 [17 – 37]                           | 20 [12 – 30]     |
| HLA-C bidirectional or GvH-directed mismatch (antigenic) (n=233)    | 33 [27 – 39]                           | 30 [24 – 37]     |
| <b>p</b>                                                            | 0.33                                   | 0.13             |
| HLA-C match or HvG-directed mismatch (allelic) (n=55)               | 21 [11 – 32]                           | 17 [8 – 29]      |
| HLA-C bidirectional or GvH-directed mismatch (allelic) (n= 203)     | 32 [25 – 38]                           | 30 [23 – 37]     |
| <b>p</b>                                                            | 0.11                                   | 0.08             |
| HLA-DRB1 match or HvG-directed mismatch (antigenic) (n=82)          | 22 [14 – 32]                           | 32 [22 – 44]     |
| HLA-DRB1 bidirectional or GvH-directed mismatch (antigenic) (n=231) | 34 [28 – 41]                           | 26 [20 – 32]     |
| <b>p</b>                                                            | <b>0.05</b>                            | 0.37             |
| HLA-DRB1 match or HvG-directed mismatch (allelic) (n=53)            | 21 [12 – 34]                           | 29 [16 – 42]     |
| HLA-DRB1 bidirectional or GvH-directed mismatch (allelic) (n=205)   | 31 [25 – 38]                           | 27 [20 – 33]     |
| <b>p</b>                                                            | 0.19                                   | 0.93             |
| <b>ATG regimens</b>                                                 |                                        |                  |
|                                                                     | <b>aGvHD <math>\geq 2</math></b>       | <b>cGvHD</b>     |
| HLA-A match or HvG-directed mismatch (antigenic) (n=44)             | 26 [14 – 40]                           | 25 [12 – 39]     |
| HLA-A bidirectional or GvH-directed mismatch (antigenic) (n=152)    | 36 [29 – 44]                           | 35 [27 – 43]     |
| <b>p</b>                                                            | 0.18                                   | 0.36             |
| HLA-A match or HvG-directed mismatch (allelic) (n=24)               | 22 [8 – 41]                            | 22 [8 – 41]      |
| HLA-A bidirectional or GvH-directed mismatch (allelic) (n=136)      | 36 [28 – 45]                           | 36 [27 – 44]     |
| <b>p</b>                                                            | 0.14                                   | 0.44             |
| HLA-B match or HvG-directed mismatch (antigenic) (n=30)             | 24 [10 – 40]                           | 36 [18 – 54]     |
| HLA-B bidirectional or GvH-directed mismatch (antigenic) (n=166)    | 36 [28 – 43]                           | 32 [25 – 40]     |
| <b>p</b>                                                            | 0.23                                   | 0.39             |
| HLA-B match or HvG-directed mismatch (allelic) (n=22)               | 18 [6 – 35]                            | 30 [11 – 51]     |
| HLA-B bidirectional or GvH-directed mismatch (allelic) (n=138)      | 37 [29 – 45]                           | 34 [26 – 42]     |
| <b>p</b>                                                            | 0.12                                   | 0.98             |
| HLA-C match or HvG-directed mismatch (antigenic) (n=54)             | 33 [21 – 46]                           | 39 [25 – 53]     |
| HLA-C bidirectional or GvH-directed mismatch (antigenic) (n=142)    | 34 [26 – 42]                           | 30 [23 – 38]     |
| <b>p</b>                                                            | 0.99                                   | 0.35             |
| HLA-C match or HvG-directed mismatch (allelic) (n=39)               | 31 [17 – 46]                           | 39 [23 – 54]     |
| HLA-C bidirectional or GvH-directed mismatch (allelic) (n=121)      | 36 [27 – 44]                           | 32 [23 – 41]     |
| <b>p</b>                                                            | 0.60                                   | 0.47             |
| HLA-DRB1 match or HvG-directed mismatch (antigenic) (n=52)          | 33 [20 – 46]                           | 26 [14 – 39]     |
| HLA-DRB1 bidirectional or GvH-directed mismatch (antigenic) (n=144) | 34 [27 – 42]                           | 35 [27 – 44]     |
| <b>p</b>                                                            | 0.78                                   | 0.18             |
| HLA-DRB1 match or HvG-directed mismatch (allelic) (n=31)            | 41 [23 – 59]                           | 20 [8 – 36]      |
| HLA-DRB1 bidirectional or GvH-directed mismatch (allelic) (n=129)   | 33 [25 – 41]                           | 37 [28 – 45]     |
| <b>p</b>                                                            | 0.40                                   | 0.10             |

Numbers correspond to % [95% CI].

**Table S5. Univariate analysis of outcome according to the number of HLA mismatches.**

| <b>PTCy regimens</b>            |                                 |                           |                      |                          |                    |                        |                   |                    |
|---------------------------------|---------------------------------|---------------------------|----------------------|--------------------------|--------------------|------------------------|-------------------|--------------------|
|                                 | <b>60-d PMN&gt;<br/>500/mm3</b> | <b>100-d<br/>aGvHD ≥2</b> | <b>2-y<br/>cGvHD</b> | <b>2-y<br/>Ext cGvHD</b> | <b>2-y<br/>TRM</b> | <b>2-y<br/>Relapse</b> | <b>2-y<br/>OS</b> | <b>2-y<br/>LFS</b> |
| ≤2 antigenic mismatches (n=43)  | 89 [74 – 96]                    | 39 [25 – 54]              | 23 [11 – 38]         | 16 [6 – 29]              | 27 [14 – 42]       | 28 [15 – 42]           | 50 [33 – 65]      | 44 [28 – 58]       |
| >2 antigenic mismatches (n=270) | 95 [92 – 97]                    | 30 [24 – 35]              | 28 [22 – 34]         | 10 [7 – 14]              | 27 [22 – 33]       | 33 [27 – 39]           | 42 [36 – 49]      | 38 [32 – 45]       |
| <b>p</b>                        | 0.80                            | 0.12                      | 0.49                 | 0.34                     | 0.86               | 0.34                   | 0.45              | 0.46               |
| ≤2 allelic mismatches (n=21)    | 95 [66 – 99]                    | 39 [18 – 60]              | 17 [4 – 38]          | 19 [6 – 39]              | 19 [6 – 38]        | 26 [9 – 48]            | 56 [31 – 75]      | 52 [27 – 72]       |
| >2 allelic mismatches (n=237)   | 95 [90 – 97]                    | 28 [22 – 34]              | 28 [22 – 34]         | 11 [7 – 16]              | 27 [21 – 33]       | 34 [27 – 40]           | 42 [35 – 49]      | 38 [31 – 45]       |
| <b>p</b>                        | 0.75                            | 0.21                      | 0.28                 | 0.31                     | 0.95               | 0.39                   | 0.44              | 0.51               |
| <b>ATG regimens</b>             |                                 |                           |                      |                          |                    |                        |                   |                    |
|                                 | <b>60-d PMN&gt;<br/>500/mm3</b> | <b>100-d<br/>aGvHD ≥2</b> | <b>2-y<br/>cGvHD</b> | <b>2-y<br/>Ext cGvHD</b> | <b>2-y<br/>TRM</b> | <b>2-y<br/>Relapse</b> | <b>2-y<br/>OS</b> | <b>2-y<br/>LFS</b> |
| ≤2 antigenic mismatches (n=33)  | 94 [76 – 98]                    | 30 [16 – 46]              | 37 [19 – 54]         | 12 [4 – 26]              | 22 [9 – 38]        | 40 [23 – 57]           | 49 [30 – 65]      | 38 [21 – 54]       |
| >2 antigenic mismatches (n=163) | 98 [94 – 99]                    | 35 [27 – 42]              | 31 [24 – 38]         | 14 [9 – 20]              | 30 [23 – 38]       | 37 [30 – 45]           | 38 [31 – 46]      | 32 [25 – 39]       |
| <b>p</b>                        | 0.47                            | 0.68                      | 0.86                 | 0.64                     | 0.25               | 0.76                   | 0.21              | 0.29               |
| ≤2 allelic mismatches (n=15)    | 94 [80 – 99]                    | 20 [5 – 43]               | 21 [5 – 46]          | 12 [2 – 34]              | 31 [8 – 58]        | 40 [15 – 64]           | 35 [12 – 60]      | 29 [8 – 54]        |
| >2 allelic mismatches (n=145)   | 98 [93 – 99]                    | 36 [28 – 44]              | 34 [26 – 42]         | 15 [9 – 21]              | 33 [26 – 41]       | 34 [26 – 42]           | 38 [30 – 47]      | 33 [25 – 41]       |
| <b>p</b>                        | 0.89                            | 0.25                      | 0.41                 | 0.79                     | 0.44               | 0.46                   | 0.64              | 0.75               |

Numbers correspond to % [95% CI].

**Table S6. Univariate analysis of outcome according to predicted NK alloreactivity in GvL vector.**

| <b>PTCy regimens</b>                          |                                            |                           |                      |                          |                    |                        |                   |                    |
|-----------------------------------------------|--------------------------------------------|---------------------------|----------------------|--------------------------|--------------------|------------------------|-------------------|--------------------|
|                                               | <b>60-d PMN&gt;<br/>500/mm<sup>3</sup></b> | <b>100-d<br/>aGvHD ≥2</b> | <b>2-y<br/>cGvHD</b> | <b>2-y<br/>Ext cGvHD</b> | <b>2-y<br/>TRM</b> | <b>2-y<br/>Relapse</b> | <b>2-y<br/>OS</b> | <b>2-y<br/>LFS</b> |
| NK alloreactivity in GvL vector<br>(n=97)     | 94 [89 – 97]                               | 23 [15 – 31]              | 24 [16 – 33]         | 11 [6 – 19]              | 25 [17 – 35]       | 41 [31 – 52]           | 37 [27 – 48]      | 33 [23 – 43]       |
| No NK alloreactivity in GvL<br>vector (n=161) | 95 [88 – 98]                               | 33 [26 – 41]              | 29 [22 – 37]         | 12 [8 – 19]              | 27 [20 – 35]       | 28 [21 – 36]           | 48 [39 – 56]      | 43 [35 – 51]       |
| <b>p</b>                                      | 0.67                                       | 0.06                      | 0.51                 | 0.87                     | 0.71               | 0.03                   | 0.19              | 0.16               |
| <b>ATG regimens</b>                           |                                            |                           |                      |                          |                    |                        |                   |                    |
|                                               | <b>60-d PMN&gt;<br/>500/mm<sup>3</sup></b> | <b>100-d<br/>aGvHD ≥2</b> | <b>2-y<br/>cGvHD</b> | <b>2-y<br/>Ext cGvHD</b> | <b>2-y<br/>TRM</b> | <b>2-y<br/>Relapse</b> | <b>2-y<br/>OS</b> | <b>2-y<br/>LFS</b> |
| NK alloreactivity in GvL vector<br>(n=67)     | 96 [89 – 99]                               | 43 [30 – 55]              | 35 [23 – 47]         | 14 [7 – 24]              | 26 [16 – 37]       | 40 [28 – 52]           | 44 [24 – 44]      | 34 [23 – 46]       |
| No NK alloreactivity in GvL<br>vector (n=93)  | 98 [89 – 99]                               | 29 [20 – 38]              | 33 [23 – 43]         | 15 [8 – 23]              | 39 [28 – 49]       | 31 [21 – 40]           | 34 [31 – 56]      | 31 [22 – 41]       |
| <b>p</b>                                      | 0.75                                       | 0.09                      | 0.93                 | 0.96                     | 0.10               | 0.30                   | 0.29              | 0.60               |

Numbers correspond to % [95% CI].

**EBMT participating centers**

Hematology and Bone Marrow Transplant Unit, San Raffaele Scientific Institute, Milan; Hematopoietic Stem Cell Transplantation Unit, MedicalPark Hospital, Antalya, Turkey; Anadolu Medical Center Hospital, Bone Marrow Transplantation Department, Kocaeli, Turkey; Stem Cell Transplant Unit, Fondazione Policlinico Tor Vergata, Tor Vergata University, Rome, Italy; Division of Hematology, University of Torino, Presidio Molinette, Torino, Italy; Division of Hematology II, IRCCS, San Martino University Hospital - IST, Genoa, Italy; Department of Internal Medicine III, Hematopoietic Cell Transplantation, Munich, Germany; Unité de transplantation et de thérapie cellulaire, Marseille, France; Azienda Ospedaliera, Reggio Calabria, Italy; Medizinische Klinik und Poliklinik I, Universitätsklinikum Carl Gustav Carus der TU Dresden, Dresden, Germany; Department of Hematology, Ospedale San Gerardo, Monza, Italy; The First Affiliated Hospital, Zhejiang University School of Medicine, Hangzhou, China; University Hospital, Udine, Italy; Hospital Universitario de Salamanca, Salamanca, Spain; King's College Hospital NHS, London, United Kingdom; AP-HP, Hématologie Clinique et Thérapie Cellulaire, Hôpital Saint-Antoine, Paris, France; Azienda Ospedaliera San Giuseppe Moscati, Avellino, Italy; Department of Bone Marrow Transplantation, University Hospital, Essen, Germany; AP-HP, Hôpital Universitaire Pitié Salpêtrière, Paris, France; Division of Hematology, IRCCS, San Matteo Hospital, Pavia, Italy; King Faisal Specialist Hospital & Research Centre, Riyadh, Saudi Arabia; First Pavlov State Medical University of St. Peterburg, St. Petersburg, Russia; Division of Hematology, Istituto Clinico Humanitas, Milan, Italy; First Affiliated Hospital of Medical School, Hangzhou, China; Division of Hematology, Papa Giovanni XXIII Hospital, Bergamo, Italy; The First Affiliated Hospital of Soochow University, Suzhou, China; Azienda Ospedali Riuniti di Ancona, Ancona-Torrete, Italy; Hospital Guglielmo da Saliceto, Piacenza, Italy; AP-HP, Hôpital Saint Louis, Paris, France; Hospital Sirio-Libanês, Sao Paulo, Brasil; University Hospital of Munich-Klinikum Grosshadern; Baskent University, Adana, Turkey; Division of Hematology, S. Croce e Carle Hospital, Cuneo, Italy; University Hospital, Basel, Switzerland; Division of Hematology, La Sapienza University Hospital, Rome, Italy; Centre hospitalier universitaire Hotel Dieu, Nantes, France; Ospedale Nord Moscati, Taranto, Italy; Medizinische Universitätsklinik, Heidelberg, Germany; National Medical Centre, Budapest, Hungary; City Hospital, Nottingham University, Nottingham, United Kingdom; Charles University Hospital, Pilsen, Czech Republic; Gregorio Marañon Hospital, Madrid, Spain; Hammersmith Hospital, London, United Kingdom; University Hospital Stockholm, Sweden; Hospital Clinic de Barcelona, Barcelona, Spain; Hôpital Jean Minjot, Besançon, France; University of Hadassah, Jerusalem, Israel; Hôpitaux Universitaires de Genève, Geneva, Switzerland; Hôpital Claude Huriez, Lille, France; Division of Hematology, S. Maurizio Hospital, Bolzano, Italy; Careggi-Meyer Hospital, Florence, Italy; Ospedale Sacro Cuore, Rome, Italy; Istituto Europeo di Oncologia, Milan, Italy; University Hospital of Hamburg, Hamburg, Germany; Division of Hematology, Policlinico di Verona, Verona, Italy; Heilig Hart Ziekenhuis Roeselare, Roeselare, Belgium; Centre Hospitalier Universitaire, Angers, France; Hospital Universitario La Fe, Valencia, Spain; Umea University Hospital, Umeå, Sweden; Tel-Aviv University, Tel-Hashomer, Israel; Division of Hematology, Ospedale Ferrarotto, Catania, Italy; University of Freiburg, Freiburg, Germany; Zentra Klinik, Augsburg, Germany; Gazi Üniversitesi Tıp Fakültesi, Ankara, Turkey; University Hospital Gasthuisberg, Leuven, Belgium; Jules Bordet Hospital, Brussels, Belgium; Universität Tübingen, Tübingen, Germany; Hospital Reina Sofia, Cordoba, Spain; Ospedale Maggiore, Milan, Italy; University Hospital, Uppsala, Finland; Hôpital Haut-Leveque, Pessac, France; Hôpital A. Michallon, Grenoble, France; Ospedale S. Camillo-Forlanini, Rome, Italy; Sahlgrenska University Hospital, Goeteborg, Sweden; Medical University, Hannover, Germany; Ospedale Regina Margherita, Torino, Italy; Klinik Diagnostik, Wiesbaden, Germany; AZN Stuivenberg, Antwerpen, Belgium; Centre For Clinical Haematology, Birmingham, United Kingdom; University Hospital, Leipzig, Germany; AZ Sint-Jan, Brugge, Belgium; Helsinki University Central Hospital, Helsinki, Finland; Hospital Dr. Negrin, Las Palmas De Gran Canaria, Spain; George Papanicolaou Hospital, Thessaloniki, Greece; Elisabethinen Hospital, Linz, Austria; Hospital Aranzazu, San Sebastian, Spain; Hospital Cavadonga, Oviedo, Spain; Hematology Institut, Prague, Czech Republic; Hôpital Gustave Roussy, Villejuif, Paris, France; Hôpital Edouard Herriot, Lyon, France; Munster University Hospital, Munster, Germany; Hematology Institut, Waesaw, Poland; Hospital Son Dureta, Palma de Mallorca, Spain; University Hospital, Liege, Belgium; Royal Hallamshire Hospital, Sheffield, United Kingdom; Ospedale Monteluce, Perugia, Italy; Ospedale S. Bartolo, Vicenza, Italy; Ospedale Roberto Binaghi, Cagliari, Italy; Centro Oncologico Regionale, Potenza, Italy.
